# Supplementary material for: Cutaneous respiration by diving beetles from underground aquifers of Western Australia (Coleoptera: Dytiscidae)
Source: Oxford University Press journal article supplement (doi:10.1242/jeb.196659), 2019-04-01
Supplement: jeb196659supp.pdf [file jeb196659supp.pdf]

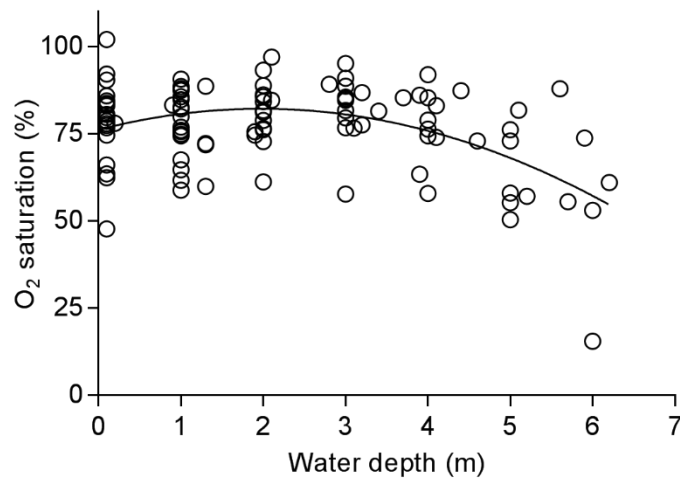

**Figure S1.** Change in O<sub>2</sub> saturation with depth in boreholes known to have subterranean beetles at the Sturt Meadows aquifer ( $N=22$  boreholes,  $N=107$  samples). Second order polynomial regression,  $y = 76.11 + 6.079x - 1.539x^2$ . Data collected April 2015, courtesy William (Bill) Humphreys, Western Australian Museum.

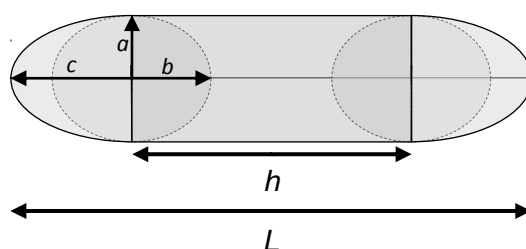

**Figure S2.** 3D geometric lozenge shape model that approximates the shape of subterranean diving beetles and allows estimation of surface area of the beetle. Axis  $a < b$ ,  $b = c$ ,  $L$  = total length, and  $h$  = elliptical cylinder length ( $L - 2c$ ). Axis  $b$  is perpendicular to the plane of the page.

## References

- Bartels, H.** (1971). Diffusion coefficients and Krogh's diffusion constants. In *Respiration and Circulation*, eds. P. L. Altman and D. S. Dittmer), pp. 21-22. Bethesda, Maryland, USA: Federation of American Societies for Experimental Biology.
- Dejours, P.** (1981). Principles of comparative respiratory physiology. Amsterdam, Netherlands: Elsevier/North-Holland Biomedical Press.
- Krogh, A.** (1919). The rate of diffusion of gases through animal tissues, with some remarks on the coefficient of invasion. *The Journal of Physiology* **52**, 391-408.
- Matthews, P. G. D. and Seymour, R. S.** (2008). Haemoglobin as a buoyancy regulator and oxygen supply in the backswimmer (Notonectidae, *Anisops*). *Journal of Experimental Biology* **211**, 3790-3799.
- Rahn, H. and Paganelli, C. V.** (1968). Gas exchange in gas gills of diving insects. *Respiration Physiology* **5**, 145-164.
- Seymour, R. S.** (1994). Oxygen diffusion through the jelly capsules of amphibian eggs. *Israel Journal of Zoology* **40**, 493-506.
- Seymour, R. S., Jones, K. K. and Hetz, S. K.** (2015). Respiratory function of the plastron in the aquatic bug *Aphelocheirus aestivalis* (Hemiptera, Aphelocheiridae). *Journal of Experimental Biology* **218**, 2840-2846.
- Spiegel, M. R., Lipschutz, S. and Liu, J.** (2013). Mathematical handbook of formulas and tables. USA: The McGraw-Hill Companies, Inc.
- Watts, C. H. S. and Humphreys, W. F.** (2006). Twenty-six new Dytiscidae (Coleoptera) of the genera *Limbodessus* Guignot and *Nirripiriti* Watts & Humphreys, from underground waters in Australia. *Transactions of the Royal Society of South Australia* **130**, 123-185.

**Table S1.** A mathematical model based on Fick's general diffusion equation to calculate  $PO_2$  at different points within the  $O_2$  cascade of subterranean diving beetles to determine where limitations to cutaneous respiration may exist. The model calculates the  $PO_2$  at the surface of the beetle and on the inside of the cuticle representing  $O_2$  diffusion through the boundary layer and cuticle, respectively. The model has the following assumptions: (1) surface area for gas exchange ( $A$ ) is defined as the surface area of a lozenge (ellipsoid and elliptical cylinder, Fig. S2), (2) conductance of  $O_2$  is constant through the water or cuticle and is the product of the Krogh's coefficient of  $O_2$  in each medium and the quotient of  $A$  and boundary layer ( $X_w$ ) or cuticle thickness ( $X_c$ ), (3) water is well-mixed and in equilibrium with atmospheric  $PO_2$  (20.6 kPa) at 25°C, and (4) diffusion to and into the surface of the beetle is linear. Variables and constants used in the model are shown in Table S2, and  $O_2$  consumption rate values are those measured experimentally in the water-only chambers (Table 2).

| Equation                                                                   | Description                                                                                                                                                                                                                                                                                                                                                                                                                                                                                                                                                                                                                                                                             |
|----------------------------------------------------------------------------|-----------------------------------------------------------------------------------------------------------------------------------------------------------------------------------------------------------------------------------------------------------------------------------------------------------------------------------------------------------------------------------------------------------------------------------------------------------------------------------------------------------------------------------------------------------------------------------------------------------------------------------------------------------------------------------------|
| (1) $\dot{M}O_2 = KO_2 \times A/X \times \Delta PO_2$                      | Fick's diffusion equation used to describe $O_2$ diffusion through water to a respiratory surface (Rahn and Paganelli, 1968). Where $\dot{M}O_2$ ( $\text{pmol s}^{-1}$ ) is the rate of $O_2$ consumption, $KO_2$ ( $\text{pmol s}^{-1} \text{kPa}^{-1} \text{cm}^{-1}$ ) is the Krogh's coefficient of diffusion, the product of capacitance and diffusivity, $A$ ( $\text{cm}^2$ ) is the surface area for gas exchange, $X$ (cm) is the boundary layer thickness, a fluid layer above a respiratory surface deficient in $O_2$ that provides resistance to $O_2$ diffusion, and $\Delta PO_2$ (kPa) is the $PO_2$ difference between the surrounding water and respiratory surface. |
| (2) $PO_{2,s} = PO_{2,w} - ((\dot{M}O_2 \times X_w)/(KO_{2,w} \times A))$  | Rearrangements of Eq. 1 allow the calculation of $PO_2$ at the surface of the beetle (Eq. 2, $PO_{2,s}$ , kPa) and on the inside of the cuticle (Eq. 3, $PO_{2,in}$ , kPa), representing diffusion through the boundary layer and cuticle respectively. Where $PO_{2,w}$ is the $PO_2$ of the bulk surrounding water, $\dot{M}O_2$ is the experimentally determined $O_2$ consumption rate, $X_w$ is the $O_2$ boundary layer surrounding the surface of the beetle, $X_c$ is the cuticle thickness, $KO_{2,w}$ is the Krogh's coefficient for water, $KO_{2,c}$ is the Krogh's coefficient for the cuticle, and $A$ is the surface area for gas exchange.                              |
| (3) $PO_{2,in} = PO_{2,s} - ((\dot{M}O_2 \times X_c)/(KO_{2,c} \times A))$ |                                                                                                                                                                                                                                                                                                                                                                                                                                                                                                                                                                                                                                                                                         |

$$(4) \quad A = 4\pi((ab)^{1.6} + (ac)^{1.6} + (bc)^{1.6}) \div 3)^{1/1.6} + (2\pi\sqrt{1/2(a^2 + b^2)}) \times h$$

Surface area of the beetle ( $A$ ) can be calculated assuming the beetles are a lozenge shape, the sum of an ellipsoid (Knud-Thomsen approximation, the two ends) and an elliptical cylinder (the middle) (Michon, 2015 [<http://www.numericana.com/answer/ellipsoid.htm#thomsen>]; Spiegel et al., 2013), according to Eq. 4. Semi-axes  $a$ ,  $b$  and  $c$ , and length ( $h$ ) of the elliptical cylinder are shown in Fig. S2. Axis  $b$  (half of beetle width) is determined for each species from the diagrams given in Watts and Humphreys (2006), with the total length to width ratio ( $L:2b$ ) being 1:2.5 for *P. macrosturtensis*, 1:2.97 for *L. palmulaoides*, and 1:2.45 for *P.*

*mesosturtensis*. Axis  $c$  equals axis  $b$ . Axis  $a$  is determined for each species in the model by producing a linear regression of the mass of the lozenge, where mass (mg)  $M_b = V \times 1078.4 \text{ mg cm}^{-3}$  (Density value determined for backswimmers, (Matthews and Seymour, 2008)) with an increasing value for  $a$ . Volume ( $V, \text{cm}^3$ ) is determined with Eq. 5, the sum of the volume of an ellipsoid and elliptical cylinder (Spiegel et al., 2013). The linear mass regression is then rearranged to calculate  $a$  from the predicted wet mass of each species. The model can be adjusted to calculate  $PO_2$  with increasing size by taking the average ratios between  $L$  and axes  $a$ ,  $b$  and  $c$  ( $a = 1:10.3$ ,  $b, c = 1:5.3$ ) in the three beetle species and maintaining the ratios of axes with increasing length. The size range used was 0.04 – 4.82 mg ( $L = 0.1 - 5 \text{ mm}$ ).

$$(5) \quad V = 4/3\pi abc + \pi abh$$

Calculation for the volume of the lozenge shape.

**Table S2.** Variables and constants used in the mathematical model to calculate the  $PO_2$  at the surface of the beetle and on the inside of the cuticle (Table S1).

| Variable   | Value                                                                                                                                                                                                        | Units                                               | Reference |
|------------|--------------------------------------------------------------------------------------------------------------------------------------------------------------------------------------------------------------|-----------------------------------------------------|-----------|
| $PO_{2,W}$ | 20.6                                                                                                                                                                                                         | kPa                                                 | 1         |
| $X_w$      | 0.010 (circulated water, all species),<br>0.075 ( <i>P. macrosturtensis</i> in stagnant water),<br>0.070 ( <i>L. palmulaoides</i> in stagnant water),<br>0.045 ( <i>P. mesosturtensis</i> in stagnant water) | cm                                                  | 2, 3      |
| $X_c$      | 0.00076 <i>P. macrosturtensis</i> ,<br>0.00078 <i>P. mesosturtensis</i> ,<br>0.000645 <i>L. palmulaoides</i>                                                                                                 | cm                                                  | 3         |
| $KO_{2,W}$ | 0.290                                                                                                                                                                                                        | $\text{pmol s}^{-1} \text{kPa}^{-1} \text{cm}^{-1}$ | 4         |
| $KO_{2,C}$ | 0.010                                                                                                                                                                                                        | $\text{pmol s}^{-1} \text{kPa}^{-1} \text{cm}^{-1}$ | 5, 6      |
| $a$        | 0.042 <i>P. macrosturtensis</i> ,<br>0.027 <i>P. mesosturtensis</i> ,<br>0.032 <i>L. palmulaoides</i>                                                                                                        | cm                                                  | 3         |
| $b, c$     | 0.08 <i>P. macrosturtensis</i> ,<br>0.039 <i>P. mesosturtensis</i> ,<br>0.086 <i>L. palmulaoides</i>                                                                                                         | cm                                                  | 3, 7      |
| $L$        | 0.4 <i>P. macrosturtensis</i> ,<br>0.23 <i>P. mesosturtensis</i> ,<br>0.42 <i>L. palmulaoides</i>                                                                                                            | cm                                                  | 7         |
| $Mb$       | 2.72 <i>P. macrosturtensis</i> ,<br>0.55 <i>P. mesosturtensis</i> ,<br>2.32 <i>L. palmulaoides</i>                                                                                                           | mg                                                  | 3         |

References: 1, Dejours, 1981; 2, Seymour *et al.*, 2015; 3, present study; 4, Seymour, 1994; 5, Krogh, 1919; 6, Bartels, 1971; 7, Watts and Humphreys, 2006; Symbols:  $X_w$  =  $O_2$  boundary layer thickness,  $X_c$  = cuticle thickness,  $KO_{2,W}$  = Krogh's coefficient of diffusion for  $O_2$  in water at 25°C,  $KO_{2,C}$  = Krogh's coefficient for chitin used for the cuticle, adjusted to 25°C with a  $Q_{10}$  of 1.1 according to Bartels (1971),  $a$  = semi-axis  $a$  of the lozenge shape used to estimate surface area of the beetles,  $b$  = semi-axis  $b$  of lozenge,  $c$  = semi-axis  $c$  of lozenge shape,  $L$  = total length of lozenge shape, and total length of each beetle species (See Fig. S2),  $Mb$  = beetle body mass.
